# Supplementary material for: Punicalagin and Ketogenic Amino Acids Loaded Organic Lipid Carriers Enhance the Bioavailability, Mitochondrial β-Oxidation, and Ketogenesis in Maturing Adipocytes
Source: MDPI journal article supplement (doi:10.3390/nano12030368), 2022-01-24
Supplement: s1 [file s1]

# **Punicalagin and Ketogenic Amino Acids Loaded Organic Lipid Carriers Enhance the Bioavailability, Mitochondrial $\beta$ -Oxidation, and Ketogenesis in Maturing Adipocytes**

Pandurangan Subash-Babu <sup>1</sup>, Nouf Al-Numair <sup>2,3</sup>, Tahani Almuzaini <sup>1</sup>, Jegan Athinarayanan <sup>1</sup> and Ali Abdullah Alshatwi <sup>1,\*</sup>

<sup>1</sup> Department of Food Science and Nutrition, College of Food and Agricultural Sciences, King Saud University, P.O. Box 2460, Riyadh 11451, Saudi Arabia; [sbpandurangan@ksu.edu.sa](mailto:sbpandurangan@ksu.edu.sa) (P.S.-B.); [toooota-nm@hotmail.com](mailto:toooota-nm@hotmail.com) (T.A.); [jathinarayanan@kse.edu.sa](mailto:jathinarayanan@kse.edu.sa) (J.A.)

<sup>2</sup> Center for Genomic Medicine, King Faisal Specialist Hospital and Research Centre, Riyadh-11451, Saudi Arabia; [alnumair@kfshrc.edu.sa](mailto:alnumair@kfshrc.edu.sa)

<sup>3</sup> College of Medicine, Alfaisal University, Riyadh-11451, Saudi Arabia

\* Correspondence: [alshatwi@ksu.edu.sa](mailto:alshatwi@ksu.edu.sa)

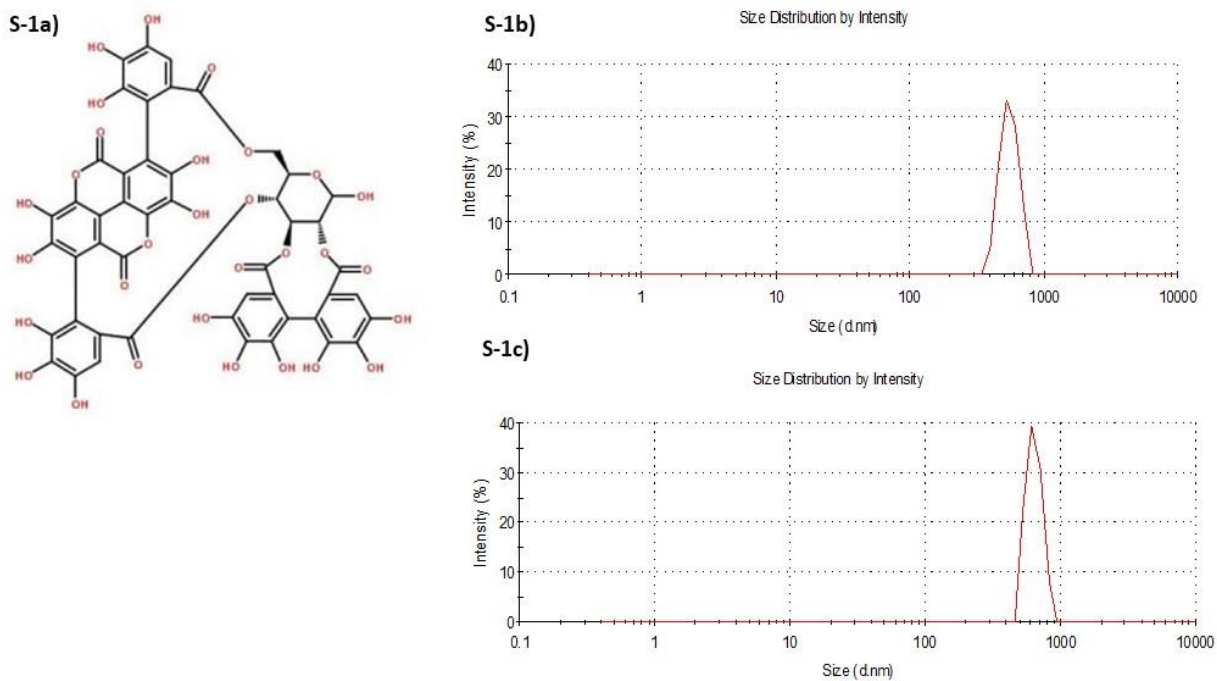

Figure S1. Molecular structure of punicalagin (**a**), Molecular formula-  $C_{48}H_{28}O_{30}$ , MW: 1084.72. Size distribution spectra (particle size) of ketogenic amino acid loaded chia seed phospholipids [NLCs-KAA] (**b**), punicalagin, ketogenic amino acids loaded chia seed phospholipids [NLCs-PUNI-KAA] (**c**) containing nano lipid carriers.

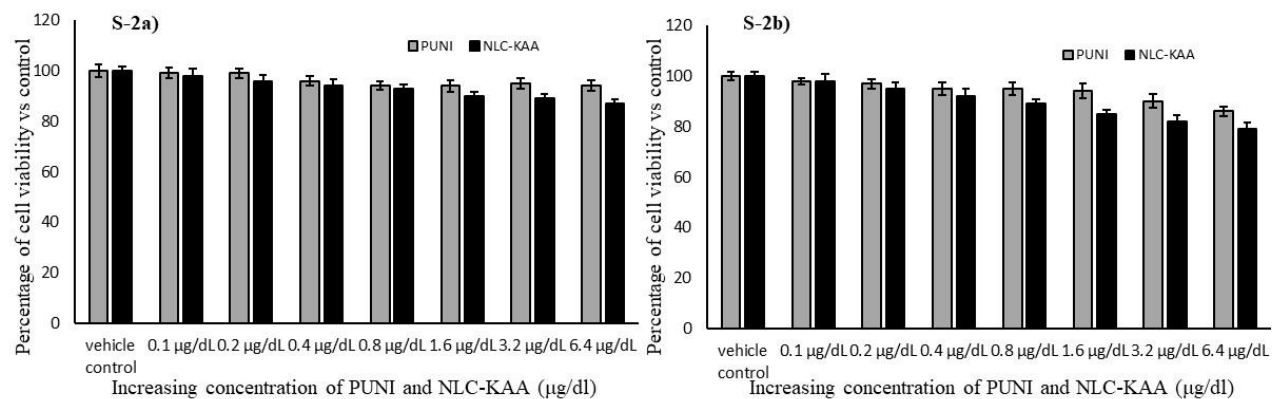

Figure S2. In vitro cytotoxicity of vehicle control, PUNI and NLCs-KAA on human mesenchymal stem cells (a) and adipocytes (b) after 48 h. Each values are means  $\pm$  SD (n = 6).

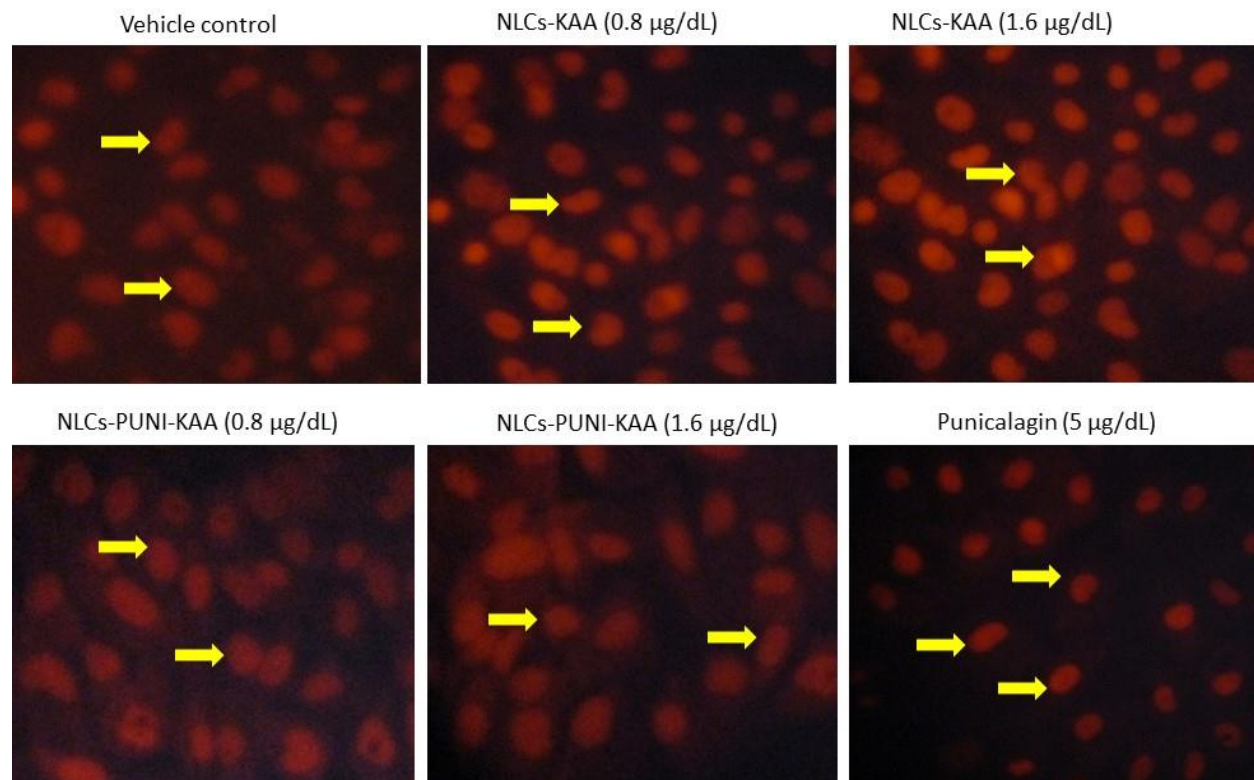

Figure S3. Fluorescence microscopic images of propidium iodide stained vehicle control, NLC-KAA, NLC-PUNI-KAA and PUNI treated human mesenchymal stem cells after 48 h. In PI staining, the hMSCs nucleus appeared normal in all the groups; there are no signs of shrunken, pyknosis, or apoptotic nucleus in NLCs-PUNI-KAA.

In propidium iodide staining, vehicle control showing normal appearance with circular shaped nucleus. NLCs-PUNI-KAA or NLCs-KAA of PUNI treated hMSCs nucleus also appeared to be normal, there are no signs of shrunken, pyknosis or apoptotic nucleus.
